# Supplementary material for: Molecular approach to prepare mixed MoW alumina supported hydrotreatment catalysts using H4SiMonW12−nO40heteropolyacids
Source: Royal Society of Chemistry journal article supplement (doi:10.1039/c8cy00672e), 2018-01-01

## checkCIF/PLATON report

You have not supplied any structure factors. As a result the full set of tests cannot be run.

THIS REPORT IS FOR GUIDANCE ONLY. IF USED AS PART OF A REVIEW PROCEDURE FOR PUBLICATION, IT SHOULD NOT REPLACE THE EXPERTISE OF AN EXPERIENCED CRYSTALLOGRAPHIC REFEREE.

No syntax errors found.      CIF dictionary      Interpreting this report

### Datablock: I

---

Bond precision:    Si- O = 0.0060 Å                      Wavelength=0.71073

Cell:                      a=12.7351(10)              b=12.7351(10)              c=18.0797(14)  
                                alpha=90                      beta=90                      gamma=90  
Temperature:              293 K

|                | Calculated           | Reported            |
|----------------|----------------------|---------------------|
| Volume         | 2932.2(5)            | 2932.2(4)           |
| Space group    | P -4 n 2             | P -4 n 2            |
| Hall group     | P -4 -2n             | P -4;-2n            |
| Moiety formula | Mo O40 Si W11, 30(O) | ?                   |
| Sum formula    | Mo O70 Si W11        | H64 Mo1 O70 Si1 W11 |
| Mr             | 3266.31              | 3330.82             |
| Dx,g cm-3      | 3.700                | 3.773               |
| Z              | 2                    | 2                   |
| Mu (mm-1)      | 21.840               | 21.842              |
| F000           | 2860.0               | 2860.0              |
| F000'          | 2842.54              |                     |
| h,k,lmax       | 15,15,22             | 15,15,22            |
| Nref           | 3025[ 1662]          | 3013                |
| Tmin,Tmax      | 0.084,0.174          | 0.500,0.800         |
| Tmin'          | 0.033                |                     |

Correction method= # Reported T Limits: Tmin=0.500 Tmax=0.800  
AbsCorr = MULTI-SCAN

Data completeness= 1.81/1.00                      Theta(max)= 26.420

R(reflections)= 0.0229( 2677)                      wR2(reflections)= wR= 0.0276( 3013)

S = 0.430                                      Npar= 175

---

The following ALERTS were generated. Each ALERT has the format

**test-name\_ALERT\_alert-type\_alert-level.**

Click on the hyperlinks for more details of the test.

---

### Alert level A

GEOM006\_ALERT\_1\_A `_geom_angle_atom_site_label_2` is missing  
Label identifying the atom site 2.  
GEOM007\_ALERT\_1\_A `_geom_angle_atom_site_label_3` is missing  
Label identifying the atom site 3.  
WEIGH01\_ALERT\_1\_A Unit weights are not acceptable for submissions to Acta  
Crystallographica Section C.  
n.b. unit is however a legal CIF keyword.  
PLAT211\_ALERT\_2\_A ADP of Atom O6 is N.P.D. or (nearly) 2D ... Please Check  
PLAT213\_ALERT\_2\_A Atom O1 has ADP max/min Ratio ..... 9.4 prolat  
PLAT213\_ALERT\_2\_A Atom O5 has ADP max/min Ratio ..... 5.6 prolat

---

### Alert level B

GOODF01\_ALERT\_2\_B The least squares goodness of fit parameter lies  
outside the range 0.60 <> 4.00  
Goodness of fit given = 0.430  
PLAT043\_ALERT\_1\_B Calculated and Reported Mol. Weight Differ by .. 64.51 Check  
PLAT214\_ALERT\_2\_B Atom Ow2 (Anion/Solvent) ADP max/min Ratio 5.7 prolat  
PLAT220\_ALERT\_2\_B Non-Solvent Resd 1 O Ueq(max)/Ueq(min) Range 6.7 Ratio  
PLAT241\_ALERT\_2\_B High 'MainMol' Ueq as Compared to Neighbors of O5 Check  
PLAT306\_ALERT\_2\_B Isolated Oxygen Atom (H-atoms Missing ?) ..... Ow1 Check  
PLAT306\_ALERT\_2\_B Isolated Oxygen Atom (H-atoms Missing ?) ..... Ow2 Check  
PLAT306\_ALERT\_2\_B Isolated Oxygen Atom (H-atoms Missing ?) ..... Ow3 Check  
PLAT306\_ALERT\_2\_B Isolated Oxygen Atom (H-atoms Missing ?) ..... Ow4 Check  
PLAT306\_ALERT\_2\_B Isolated Oxygen Atom (H-atoms Missing ?) ..... Ow5 Check  
PLAT306\_ALERT\_2\_B Isolated Oxygen Atom (H-atoms Missing ?) ..... Ow6 Check  
PLAT306\_ALERT\_2\_B Isolated Oxygen Atom (H-atoms Missing ?) ..... Ow7 Check  
PLAT306\_ALERT\_2\_B Isolated Oxygen Atom (H-atoms Missing ?) ..... Ow8 Check

---

### Alert level C

ABSTY02\_ALERT\_1\_C An `_exptl_absorpt_correction_type` has been given without  
a literature citation. This should be contained in the  
`_exptl_absorpt_process_details` field.  
Absorption correction given as multi-scan  
CHEMW03\_ALERT\_2\_C The ratio of given/expected molecular weight as  
calculated from the `_atom_site*` data lies outside  
the range 0.99 <> 1.01  
From the CIF: `_cell_formula_units_Z` 2  
From the CIF: `_chemical_formula_weight` 3330.82  
TEST: Calculate formula weight from `_atom_site*`  
atom mass num sum  
H 1.01 0.00 0.00  
Mo 95.94 1.00 95.90  
O 16.00 70.00 1119.93  
Si 28.09 1.00 28.09  
W 183.85 11.00 2022.42  
Calculated formula weight 3266.34  
STRVA01\_ALERT\_4\_C Flack test results are ambiguous.  
From the CIF: `_refine_ls_abs_structure_Flack` 0.500  
From the CIF: `_refine_ls_abs_structure_Flack_su` 0.030  
PLAT041\_ALERT\_1\_C Calc. and Reported SumFormula Strings Differ Please Check  
PLAT127\_ALERT\_1\_C Implicit Hall Symbol Inconsistent with Explicit P -4;-2n  
PLAT202\_ALERT\_3\_C Isotropic non-H Atoms in Anion/Solvent ..... 1 Check  
PLAT214\_ALERT\_2\_C Atom Ow5 (Anion/Solvent) ADP max/min Ratio 4.9 prolat

|                   |      |           |                                 |    |       |
|-------------------|------|-----------|---------------------------------|----|-------|
| PLAT241_ALERT_2_C | High | 'MainMol' | Ueq as Compared to Neighbors of | 01 | Check |
| PLAT241_ALERT_2_C | High | 'MainMol' | Ueq as Compared to Neighbors of | 03 | Check |
| PLAT241_ALERT_2_C | High | 'MainMol' | Ueq as Compared to Neighbors of | 06 | Check |

---

### ● Alert level G

FORMU01\_ALERT\_2\_G There is a discrepancy between the atom counts in the  
   \_chemical\_formula\_sum and the formula from the \_atom\_site\* data.  
   Atom count from \_chemical\_formula\_sum: H64 Mo1 O70 Si1 W11  
   Atom count from the \_atom\_site data: Mol.0046 O70 Si1 W11.

CELLZ01\_ALERT\_1\_G Difference between formula and atom\_site contents detected.

CELLZ01\_ALERT\_1\_G WARNING: H atoms missing from atom site list. Is this intentional?  
   From the CIF: \_cell\_formula\_units\_Z 2  
   From the CIF: \_chemical\_formula\_sum H64 Mo1 O70 Si1 W11  
   TEST: Compare cell contents of formula and atom\_site data

| atom | Z*formula | cif sites | diff   |
|------|-----------|-----------|--------|
| H    | 128.00    | 0.00      | 128.00 |
| Mo   | 2.00      | 2.00      | 0.00   |
| O    | 140.00    | 140.00    | 0.00   |
| Si   | 2.00      | 2.00      | 0.00   |
| W    | 22.00     | 22.00     | 0.00   |

|                   |                                                  |        |              |
|-------------------|--------------------------------------------------|--------|--------------|
| PLAT004_ALERT_5_G | Polymeric Structure Found with Maximum Dimension | 2      | Info         |
| PLAT005_ALERT_5_G | No Embedded Refinement Details found in the CIF  |        | Please Do !  |
| PLAT199_ALERT_1_G | Reported _cell_measurement_temperature ..... (K) | 293    | Check        |
| PLAT200_ALERT_1_G | Reported _diffrn_ambient_temperature ..... (K)   | 293    | Check        |
| PLAT300_ALERT_4_G | Atom Site Occupancy of >W1 is Constrained at     | 0.9167 | Check        |
| PLAT300_ALERT_4_G | Atom Site Occupancy of >W2 is Constrained at     | 0.9167 | Check        |
| PLAT300_ALERT_4_G | Atom Site Occupancy of >W3 is Constrained at     | 0.9167 | Check        |
| PLAT300_ALERT_4_G | Atom Site Occupancy of <Mo1 is Constrained at    | 0.0833 | Check        |
| PLAT300_ALERT_4_G | Atom Site Occupancy of <Mo2 is Constrained at    | 0.0833 | Check        |
| PLAT300_ALERT_4_G | Atom Site Occupancy of <Mo3 is Constrained at    | 0.0833 | Check        |
| PLAT301_ALERT_3_G | Main Residue Disorder ..... Percentage =         | 21     | Note         |
| PLAT720_ALERT_4_G | Number of Unusual/Non-Standard Labels .....      | 8      | Note         |
| PLAT792_ALERT_1_G | The Model has Chirality at Si1 (Polar SPGR)      | R      | Verify       |
| PLAT808_ALERT_5_G | No Parseable SHELXL Style Weighting Scheme Found |        | Please Check |

---

6 **ALERT level A** = Most likely a serious problem - resolve or explain  
 13 **ALERT level B** = A potentially serious problem, consider carefully  
 10 **ALERT level C** = Check. Ensure it is not caused by an omission or oversight  
 17 **ALERT level G** = General information/check it is not something unexpected

12 ALERT type 1 CIF construction/syntax error, inconsistent or missing data  
 21 ALERT type 2 Indicator that the structure model may be wrong or deficient  
 2 ALERT type 3 Indicator that the structure quality may be low  
 8 ALERT type 4 Improvement, methodology, query or suggestion  
 3 ALERT type 5 Informative message, check

---

It is advisable to attempt to resolve as many as possible of the alerts in all categories. Often the minor alerts point to easily fixed oversights, errors and omissions in your CIF or refinement strategy, so attention to these fine details can be worthwhile. In order to resolve some of the more serious problems it may be necessary to carry out additional measurements or structure refinements. However, the purpose of your study may justify the reported deviations and the more serious of these should normally be commented upon in the discussion or experimental section of a paper or in the "special\_details" fields of the CIF. checkCIF was carefully designed to identify outliers and unusual parameters, but every test has its limitations and alerts that are not important in a particular case may appear. Conversely, the absence of alerts does not guarantee there are no aspects of the results needing attention. It is up to the individual to critically assess their own results and, if necessary, seek expert advice.

### **Publication of your CIF in IUCr journals**

A basic structural check has been run on your CIF. These basic checks will be run on all CIFs submitted for publication in IUCr journals (*Acta Crystallographica*, *Journal of Applied Crystallography*, *Journal of Synchrotron Radiation*); however, if you intend to submit to *Acta Crystallographica Section C* or *E* or *IUCrData*, you should make sure that full publication checks are run on the final version of your CIF prior to submission.

### **Publication of your CIF in other journals**

Please refer to the *Notes for Authors* of the relevant journal for any special instructions relating to CIF submission.

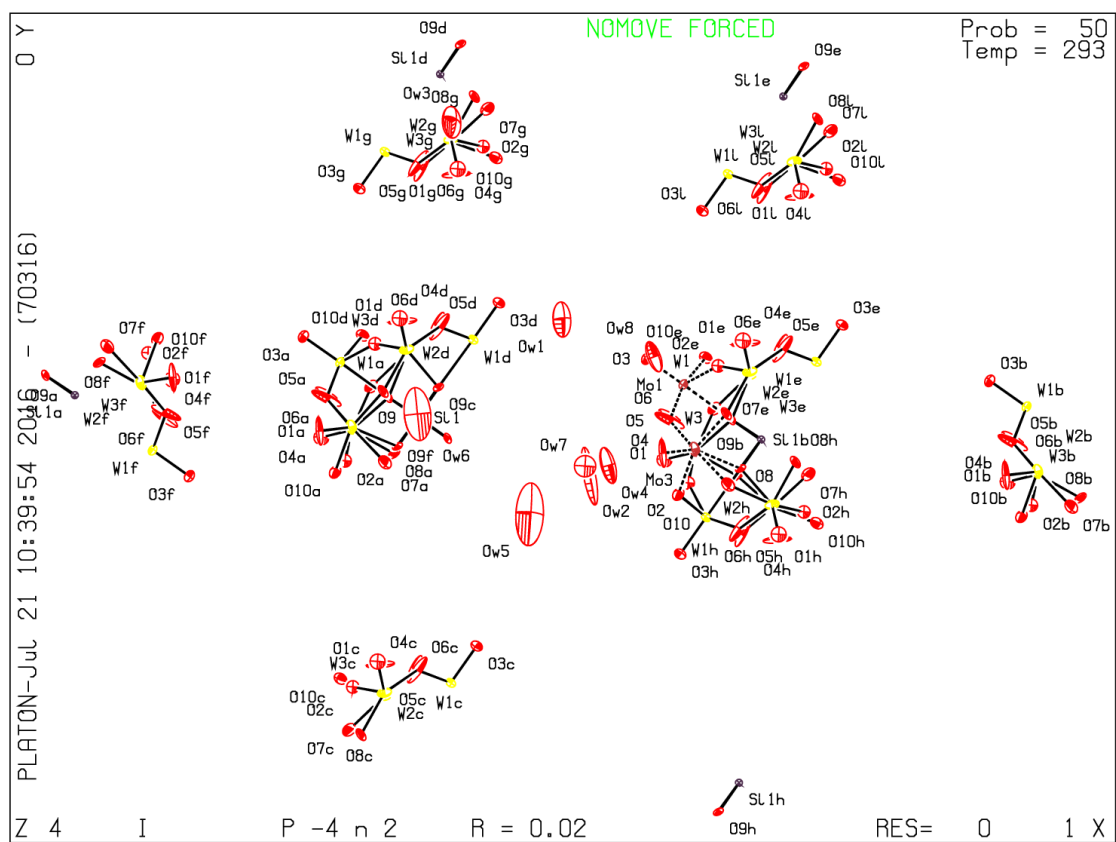

Supplement: c8cy00672e1.pdf [file c8cy00672e1.pdf]
