# Supplementary material for: Molecular approach to prepare mixed MoW alumina supported hydrotreatment catalysts using H4SiMonW12−nO40heteropolyacids
Source: Royal Society of Chemistry journal article supplement (doi:10.1039/c8cy00672e), 2018-01-01

## checkCIF/PLATON report

You have not supplied any structure factors. As a result the full set of tests cannot be run.

THIS REPORT IS FOR GUIDANCE ONLY. IF USED AS PART OF A REVIEW PROCEDURE FOR PUBLICATION, IT SHOULD NOT REPLACE THE EXPERTISE OF AN EXPERIENCED CRYSTALLOGRAPHIC REFEREE.

No syntax errors found.      CIF dictionary      Interpreting this report

### Datablock: I

---

|                 |                      |                                |
|-----------------|----------------------|--------------------------------|
| Bond precision: | Si- O = 0.0072 Å     | Wavelength=0.71073             |
| Cell:           | a=10.1951(2)         | b=14.4697(2)      c=14.8556(2) |
|                 | alpha=90             | beta=100.3961(8)      gamma=90 |
| Temperature:    | 293 K                |                                |
|                 | Calculated           | Reported                       |
| Volume          | 2155.52(6)           | 2155.52(6)                     |
| Space group     | P 21/m               | P 1 21/m 1                     |
| Hall group      | -P 2yb               | -P 2yb                         |
| Moiety formula  | Mo3 O40 Si W9, 10(O) | ?                              |
| Sum formula     | Mo3 O50 Si W9        | H24 Mo3 O50 Si1 W9             |
| Mr              | 2770.47              | 2794.70                        |
| Dx,g cm-3       | 4.269                | 4.306                          |
| Z               | 2                    | 2                              |
| Mu (mm-1)       | 24.897               | 24.899                         |
| F000            | 2412.0               | 2412.0                         |
| F000'           | 2390.11              |                                |
| h,k,lmax        | 13,19,20             | 13,19,20                       |
| Nref            | 5740                 | 5729                           |
| Tmin,Tmax       | 0.026,0.019          | 0.500,0.950                    |
| Tmin'           | 0.013                |                                |

Correction method= # Reported T Limits: Tmin=0.500 Tmax=0.950  
AbsCorr = ?

Data completeness= 0.998      Theta(max)= 28.620

R(reflections)= 0.0284( 4506)      wR2(reflections)= wR= 0.0448( 5729)

S = 1.920      Npar= 176

---

The following ALERTS were generated. Each ALERT has the format

**test-name\_ALERT\_alert-type\_alert-level.**

Click on the hyperlinks for more details of the test.

---

### Alert level A

GEOM006\_ALERT\_1\_A \_geom\_angle\_atom\_site\_label\_2 is missing  
Label identifying the atom site 2.  
GEOM007\_ALERT\_1\_A \_geom\_angle\_atom\_site\_label\_3 is missing  
Label identifying the atom site 3.

---

### Alert level B

|                   |                                          |       |     |       |
|-------------------|------------------------------------------|-------|-----|-------|
| PLAT306_ALERT_2_B | Isolated Oxygen Atom (H-atoms Missing ?) | ..... | Ow1 | Check |
| PLAT306_ALERT_2_B | Isolated Oxygen Atom (H-atoms Missing ?) | ..... | Ow2 | Check |
| PLAT306_ALERT_2_B | Isolated Oxygen Atom (H-atoms Missing ?) | ..... | Ow3 | Check |
| PLAT306_ALERT_2_B | Isolated Oxygen Atom (H-atoms Missing ?) | ..... | Ow4 | Check |
| PLAT306_ALERT_2_B | Isolated Oxygen Atom (H-atoms Missing ?) | ..... | Ow5 | Check |
| PLAT306_ALERT_2_B | Isolated Oxygen Atom (H-atoms Missing ?) | ..... | Ow6 | Check |
| PLAT306_ALERT_2_B | Isolated Oxygen Atom (H-atoms Missing ?) | ..... | O20 | Check |

---

### Alert level C

|                   |                                                |                |        |       |
|-------------------|------------------------------------------------|----------------|--------|-------|
| PLAT041_ALERT_1_C | Calc. and Reported SumFormula                  | Strings Differ | Please | Check |
| PLAT043_ALERT_1_C | Calculated and Reported Mol. Weight            | Differ by ..   | 24.23  | Check |
| PLAT052_ALERT_1_C | Info on Absorption Correction Method           | Not Given      | Please | Do !  |
| PLAT202_ALERT_3_C | Isotropic non-H Atoms in Anion/Solvent         | .....          | 7      | Check |
| PLAT601_ALERT_2_C | Structure Contains Solvent Accessible VOIDS of | .              | 58     | Ang3  |

---

### Alert level G

FORMU01\_ALERT\_2\_G There is a discrepancy between the atom counts in the  
\_chemical\_formula\_sum and the formula from the \_atom\_site\* data.  
Atom count from \_chemical\_formula\_sum: H24 Mo3 O50 Si1 W9  
Atom count from the \_atom\_site data: Mo3 O50 Si1 W9

CELLZ01\_ALERT\_1\_G Difference between formula and atom\_site contents detected.  
CELLZ01\_ALERT\_1\_G WARNING: H atoms missing from atom site list. Is this intentional?  
From the CIF: \_cell\_formula\_units\_Z 2  
From the CIF: \_chemical\_formula\_sum H24 Mo3 O50 Si1 W9  
TEST: Compare cell contents of formula and atom\_site data

| atom | Z*formula | cif sites | diff  |
|------|-----------|-----------|-------|
| H    | 48.00     | 0.00      | 48.00 |
| Mo   | 6.00      | 6.00      | 0.00  |
| O    | 100.00    | 100.00    | 0.00  |
| Si   | 2.00      | 2.00      | 0.00  |
| W    | 18.00     | 18.00     | 0.00  |

|                   |                                         |                  |        |       |
|-------------------|-----------------------------------------|------------------|--------|-------|
| PLAT005_ALERT_5_G | No Embedded Refinement Details found    | in the CIF       | Please | Do !  |
| PLAT199_ALERT_1_G | Reported _cell_measurement_temperature  | ..... (K)        | 293    | Check |
| PLAT200_ALERT_1_G | Reported _diffrn_ambient_temperature    | ..... (K)        | 293    | Check |
| PLAT304_ALERT_4_G | Non-Integer Number of Atoms (           | 0.50) in Resd. # | 2      | Check |
| PLAT304_ALERT_4_G | Non-Integer Number of Atoms (           | 0.50) in Resd. # | 5      | Check |
| PLAT304_ALERT_4_G | Non-Integer Number of Atoms (           | 0.50) in Resd. # | 6      | Check |
| PLAT304_ALERT_4_G | Non-Integer Number of Atoms (           | 0.50) in Resd. # | 8      | Check |
| PLAT720_ALERT_4_G | Number of Unusual/Non-Standard Labels   | .....            | 6      | Note  |
| PLAT790_ALERT_4_G | Centre of Gravity not Within Unit Cell: | Resd. #          | 3      | Note  |
|                   | O                                       |                  |        |       |
| PLAT790_ALERT_4_G | Centre of Gravity not Within Unit Cell: | Resd. #          | 7      | Note  |
|                   | O                                       |                  |        |       |
| PLAT790_ALERT_4_G | Centre of Gravity not Within Unit Cell: | Resd. #          | 8      | Note  |
|                   | O                                       |                  |        |       |

---

2 **ALERT level A** = Most likely a serious problem - resolve or explain  
7 **ALERT level B** = A potentially serious problem, consider carefully  
5 **ALERT level C** = Check. Ensure it is not caused by an omission or oversight  
15 **ALERT level G** = General information/check it is not something unexpected

9 ALERT type 1 CIF construction/syntax error, inconsistent or missing data  
9 ALERT type 2 Indicator that the structure model may be wrong or deficient  
1 ALERT type 3 Indicator that the structure quality may be low  
8 ALERT type 4 Improvement, methodology, query or suggestion  
2 ALERT type 5 Informative message, check

---

It is advisable to attempt to resolve as many as possible of the alerts in all categories. Often the minor alerts point to easily fixed oversights, errors and omissions in your CIF or refinement strategy, so attention to these fine details can be worthwhile. In order to resolve some of the more serious problems it may be necessary to carry out additional measurements or structure refinements. However, the purpose of your study may justify the reported deviations and the more serious of these should normally be commented upon in the discussion or experimental section of a paper or in the "special\_details" fields of the CIF. checkCIF was carefully designed to identify outliers and unusual parameters, but every test has its limitations and alerts that are not important in a particular case may appear. Conversely, the absence of alerts does not guarantee there are no aspects of the results needing attention. It is up to the individual to critically assess their own results and, if necessary, seek expert advice.

#### **Publication of your CIF in IUCr journals**

A basic structural check has been run on your CIF. These basic checks will be run on all CIFs submitted for publication in IUCr journals (*Acta Crystallographica*, *Journal of Applied Crystallography*, *Journal of Synchrotron Radiation*); however, if you intend to submit to *Acta Crystallographica Section C* or *E* or *IUCrData*, you should make sure that full publication checks are run on the final version of your CIF prior to submission.

#### **Publication of your CIF in other journals**

Please refer to the *Notes for Authors* of the relevant journal for any special instructions relating to CIF submission.

---

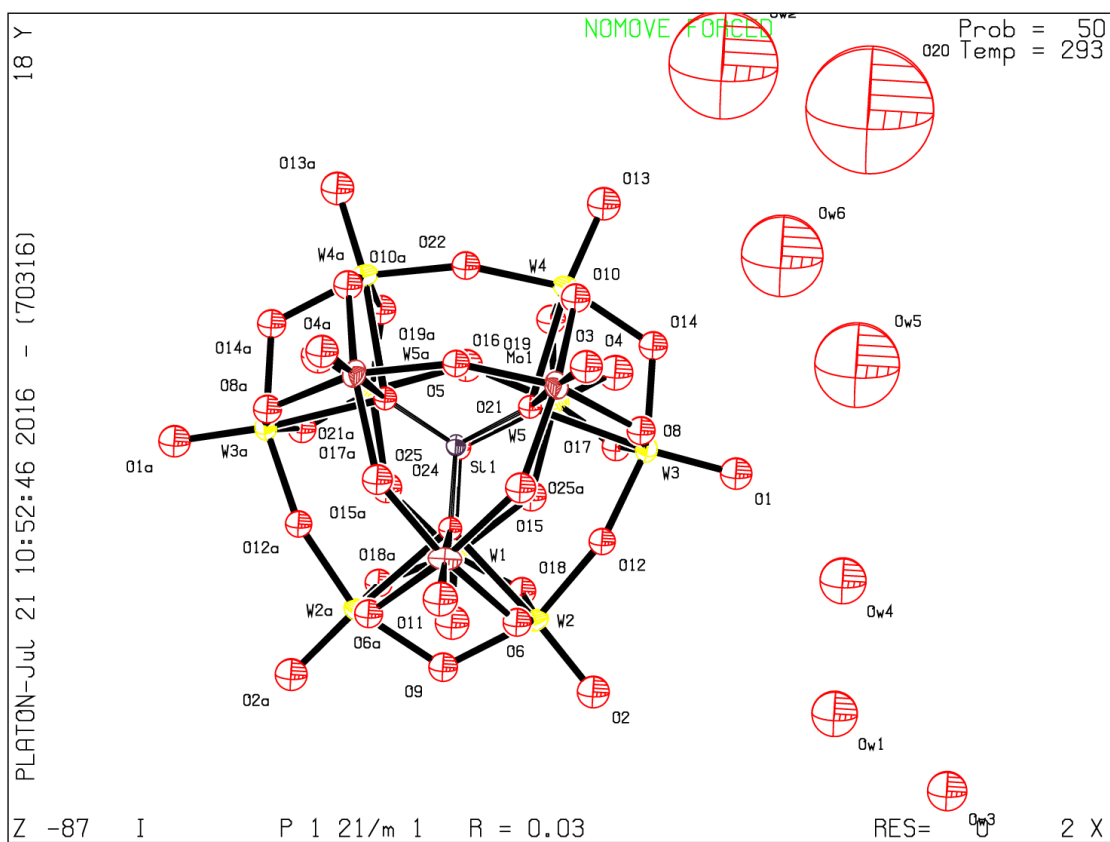

Supplement: c8cy00672e2.pdf [file c8cy00672e2.pdf]
